# Supplementary material for: Risk factors for fear of falling in stroke patients: a systematic review and meta-analysis
Source: HighWire-hosted journal article supplement (doi:10.1136/bmjopen-2021-056340), 2022-06-01
Supplement: bmjopen-2021-056340supp001_data_supplement.pdf [file bmjopen-2021-056340supp001_data_supplement.pdf]

## Pubmed: from inception to July 20, 2021

| # | searches                                                                                                                                                                                                                                                                                                                                                                                                                                                                                                                                                                                    | results |
|---|---------------------------------------------------------------------------------------------------------------------------------------------------------------------------------------------------------------------------------------------------------------------------------------------------------------------------------------------------------------------------------------------------------------------------------------------------------------------------------------------------------------------------------------------------------------------------------------------|---------|
| 1 | "Stroke"[MeSH Terms] OR "Carotid Artery Diseases"[MeSH Terms] OR "Cerebrovascular Disorders"[MeSH Terms] OR "Basal Ganglia Cerebrovascular Disease"[MeSH Terms] OR "Cerebral Infarction"[MeSH Terms] OR "Brain Ischemia"[MeSH Terms] OR "Cerebral Small Vessel Diseases"[MeSH Terms] OR "Intracranial Arterial Diseases"[MeSH Terms] OR "Intracranial Hemorrhages"[MeSH Terms] OR "Brain Infarction"[MeSH Terms] OR "stroke, lacunar"[MeSH Terms] OR "vasospasm, intracranial"[MeSH Terms] OR "Hemiplegia"[MeSH Terms] OR "Paresis"[MeSH Terms] OR "gait disorders, neurologic"[MeSH Terms] | 405,432 |
| 2 | stroke*[Title/Abstract] OR "Cerebrovascular Accident*" [Title/Abstract] OR "Cerebrovascular Apoplexy" [Title/Abstract] OR "Brain Vascular Accident*" [Title/Abstract] OR "Cerebrovascular Stroke*" [Title/Abstract] OR "Apoplexy" [Title/Abstract] OR "Cerebral Stroke*" [Title/Abstract] OR "Acute Stroke*" [Title/Abstract] OR "Acute Cerebrovascular Accident*" [Title/Abstract] OR "Brain Stem Infarctions" [Title/Abstract] OR "Cerebral                                                                                                                                               | 473,904 |

|                                                       |    |                                                    |
|-------------------------------------------------------|----|----------------------------------------------------|
| Infarction"[Title/Abstract]                           | OR | "Hemorrhagic Stroke"[Title/Abstract]               |
| OR "Ischemic Stroke"[Title/Abstract]                  | OR | "Embolitic Stroke"[Title/Abstract]                 |
| OR "Thrombotic Stroke"[Title/Abstract]                | OR | "Cardiovascular Diseases"[Title/Abstract]          |
| OR "Vascular Diseases"[Title/Abstract]                | OR | "Carotid Artery Disease*"[Title/Abstract]          |
| OR "Carotid Artery Disorder*"[Title/Abstract]         | OR | "Carotid Arterial Disease*"[Title/Abstract]        |
| OR "Carotid Atheroscleros*"[Title/Abstract]           | OR | "Carotid Atherosclerotic Disease*"[Title/Abstract] |
| OR "Internal Carotid Artery Diseases"[Title/Abstract] | OR | Common Carotid Artery Diseases[Title/Abstract]     |
| OR External Carotid Artery Diseases[Title/Abstract]   | OR | External Carotid Arterial Diseases[Title/Abstract] |
| OR "Carotid Artery Thrombosis"[Title/Abstract]        | OR | "Cerebrovascular Disorder*"[Title/Abstract]        |
| OR "Intracranial Vascular Disease*"[Title/Abstract]   | OR | "Intracranial Vascular Disorder*"[Title/Abstract]  |
| OR "Cerebrovascular Disease*"[Title/Abstract]         | OR | "Brain Vascular Disorder*"[Title/Abstract]         |
| OR "Cerebrovascular Occlusion*"[Title/Abstract]       | OR | "Cerebrovascular Insufficienc*"[Title/Abstract]    |
| OR "Basal Ganglia Vascular                            |    |                                                    |

|                                          |    |                                          |
|------------------------------------------|----|------------------------------------------|
| Disease*[Title/Abstract]                 | OR | "Lenticulostriate                        |
| Vasculopath*[Title/Abstract]             | OR | Lenticulostriate                         |
| Disease*[Title/Abstract]                 | OR | Vascular                                 |
| Diseases[Title/Abstract]                 | OR | "Basal                                   |
| Hemorrhage"[Title/Abstract]              | OR | "Putaminal                               |
| Hemorrhage"[Title/Abstract]              | OR | "Cerebral                                |
| Infarct*[Title/Abstract]                 | OR | "Left Hemisphere                         |
| Infarction"[Title/Abstract]              | OR | "Subcortical                             |
| Infarction*[Title/Abstract]              | OR | "Posterior Choroidal Artery              |
| Infarction"[Title/Abstract]              | OR | "Anterior Choroidal Artery               |
| Infarction"[Title/Abstract]              | OR | "Right Hemisphere                        |
| Infarction"[Title/Abstract]              | OR | "CADASIL"[Title/Abstract]                |
| "Multi-Infarct Dementia"[Title/Abstract] | OR | "Anterior Cerebral                       |
| Artery Infarction"[Title/Abstract]       | OR | "Middle Cerebral Artery                  |
| Infarction"[Title/Abstract]              | OR | "Posterior Cerebral Artery               |
| Infarction"[Title/Abstract]              | OR | "Brain Ischemia*[Title/Abstract]         |
| OR                                       |    | "Ischemic Encephalopath*[Title/Abstract] |
| OR                                       |    | "Cerebral                                |
| Ischemia*[Title/Abstract]                | OR | "Brain                                   |
| Hypoxia-Ischemia"[Title/Abstract]        | OR | "Cerebral Small Vessel                   |
| Disease*[Title/Abstract]                 | OR | "Cerebral                                |
| Microangiopath*[Title/Abstract]          | OR | "Intracranial Arterial                   |
| Disease*[Title/Abstract]                 | OR | "Intracranial Arterial                   |

|                                                         |                                      |                                    |                  |
|---------------------------------------------------------|--------------------------------------|------------------------------------|------------------|
| Disorder*[Title/Abstract]                               | OR                                   | "Arterial                          | Brain            |
| Disease*[Title/Abstract]                                | OR                                   | Brain                              | Arterial         |
| Disease*[Title/Abstract]                                | OR                                   | Arterial                           | Brain            |
| Disorder*[Title/Abstract]                               | OR                                   | "Intracranial                      |                  |
| Hemorrhage*[Title/Abstract]                             | OR                                   | "Posterior                         | Fossa            |
| Hemorrhage*[Title/Abstract]                             | OR                                   | "Brain                             |                  |
| Hemorrhage*[Title/Abstract]                             | OR                                   | "Cerebral                          |                  |
| Hemorrhage*[Title/Abstract]                             | OR                                   | "Cerebral                          | Intraventricular |
| Hemorrhage*[Title/Abstract]                             | OR                                   | "Hypertensive                      | Intracranial     |
| Hemorrhage*[Title/Abstract]                             | OR                                   | "Cranial                           | Epidural         |
| Hematoma*[Title/Abstract]                               | OR                                   | "Subdural                          |                  |
| Hematoma*[Title/Abstract]                               | OR                                   | "Pituitary                         |                  |
| Apoplexy*[Title/Abstract]                               | OR                                   | "Subarachnoid                      |                  |
| Hemorrhage*[Title/Abstract]                             | OR                                   | "Brain                             |                  |
| Infarction*[Title/Abstract]                             | OR                                   | "Brain Infarct*[Title/Abstract]    | OR               |
| "Anterior Circulation Brain Infarction"[Title/Abstract] | OR                                   | "Brain                             |                  |
| Venous Infarction*[Title/Abstract]                      | OR                                   | "Anterior Cerebral                 |                  |
| Circulation Infarction"[Title/Abstract]                 | OR                                   | "Posterior Circulation             |                  |
| Brain Infarction"[Title/Abstract]                       | OR                                   | "Lacunar                           |                  |
| Stroke*[Title/Abstract]                                 | OR                                   | "Lacunar Syndrome*[Title/Abstract] |                  |
| OR                                                      | "Lacunar Infarction*[Title/Abstract] | OR                                 | "Lacunar         |
| Infarct*[Title/Abstract]                                | OR                                   | "Intracranial                      |                  |

|                                         |    |                                |
|-----------------------------------------|----|--------------------------------|
| Vasospasm*[Title/Abstract]              | OR | Intracranial                   |
| Angiospasm*[Title/Abstract]             | OR | "Intracranial Vascular         |
| Spasm*[Title/Abstract]                  | OR | "Cerebral                      |
| Vasospasm*[Title/Abstract]              | OR | "Cerebrovascular               |
| Spasm*[Title/Abstract]                  | OR | "Cerebral                      |
| Angiospasm*[Title/Abstract]             | OR | "Cerebral Artery               |
| Spasm*[Title/Abstract]                  | OR | "Hemiplegia*[Title/Abstract]   |
| "Transient Hemiplegia*[Title/Abstract]  | OR |                                |
| "Monoplegia*[Title/Abstract]            | OR | "Post-Ictal                    |
| Hemiplegia*[Title/Abstract]             | OR | "Crossed                       |
| Hemiplegia*[Title/Abstract]             | OR | "Flaccid                       |
| Hemiplegia*[Title/Abstract]             | OR | "Infantile                     |
| Hemiplegia*[Title/Abstract]             | OR | "Spastic                       |
| Hemiplegia*[Title/Abstract]             | OR | "Pareses"[Title/Abstract]      |
| "Paraparesis"[Title/Abstract]           | OR | "Muscular                      |
| Pares*[Title/Abstract]                  | OR | "Muscle Pares*[Title/Abstract] |
| "Monopares*[Title/Abstract]             | OR | "Lower Extremity               |
| Pares*[Title/Abstract]                  | OR | "Crural Pares*[Title/Abstract] |
| "Upper Extremity Pares*[Title/Abstract] | OR | "Brachial                      |
| Pares*[Title/Abstract]                  | OR | "Hemipares*[Title/Abstract]    |
| "Spastic Paraparesis"[Title/Abstract]   | OR | "Neurologic Gait               |
| Disorder*[Title/Abstract]               | OR | Neurologic Locomotion          |

|   |                                                                                                                                                                                                                                                                                                                                                                                                                                                                                                                                                                                                                                                                                                                                                                                                                                                                                                                                                                                                     |         |
|---|-----------------------------------------------------------------------------------------------------------------------------------------------------------------------------------------------------------------------------------------------------------------------------------------------------------------------------------------------------------------------------------------------------------------------------------------------------------------------------------------------------------------------------------------------------------------------------------------------------------------------------------------------------------------------------------------------------------------------------------------------------------------------------------------------------------------------------------------------------------------------------------------------------------------------------------------------------------------------------------------------------|---------|
|   | Disorder*[Title/Abstract] OR Neurologic Ambulation Disorder*[Title/Abstract] OR "Neurologic Gait Dysfunction*" [Title/Abstract] OR "Duck Gait" [Title/Abstract] OR Sensorimotor Gait Disorder*[Title/Abstract] OR Athetotic Gait [Title/Abstract] OR Broadened Gait [Title/Abstract] OR "Drop Foot Gait" [Title/Abstract] OR "Festinating Gait" [Title/Abstract] OR "Frontal Gait" [Title/Abstract] OR "Hemiplegic Gait" [Title/Abstract] OR "Hysterical Gait" [Title/Abstract] OR Reeling Gait [Title/Abstract] OR "Rigid Gait" [Title/Abstract] OR "Scissors Gait" [Title/Abstract] OR "Shuffling Gait*" [Title/Abstract] OR "Spastic Gait" [Title/Abstract] OR "Stumbling Gait" [Title/Abstract] OR "Unsteady Gait" [Title/Abstract] OR Widebased Gait [Title/Abstract] OR "Marche a Petit Pas" [Title/Abstract] OR Rapid Fatigue Gait [Title/Abstract] OR Charcot Gait* [Title/Abstract] OR Charcot* Gait [Title/Abstract] OR "Gait Apraxia" [Title/Abstract] OR "Gait Ataxia" [Title/Abstract] |         |
| 3 | #1 OR #2                                                                                                                                                                                                                                                                                                                                                                                                                                                                                                                                                                                                                                                                                                                                                                                                                                                                                                                                                                                            | 654,634 |
| 4 | "Accidental Falls" [MeSH Terms] OR "Accidents" [MeSH Terms] OR "Accident Prevention" [MeSH Terms]                                                                                                                                                                                                                                                                                                                                                                                                                                                                                                                                                                                                                                                                                                                                                                                                                                                                                                   | 198,327 |
| 5 | "Falls" [Title/Abstract] OR "Falling" [Title/Abstract] OR "Accidental Fall*" [Title/Abstract] OR "Slip and Fall" [Title/Abstract] OR "Fall and Slip" [Title/Abstract] OR "Accident                                                                                                                                                                                                                                                                                                                                                                                                                                                                                                                                                                                                                                                                                                                                                                                                                  | 114,050 |

|    |                                                                                                                                                                                                                                                                                                                                                                                     |         |
|----|-------------------------------------------------------------------------------------------------------------------------------------------------------------------------------------------------------------------------------------------------------------------------------------------------------------------------------------------------------------------------------------|---------|
|    | Prevention"[Title/Abstract] OR "Accidental Falls"[Title/Abstract]<br>OR "Home Accidents"[Title/Abstract] OR "Accident<br>Prevention*"[Title/Abstract] OR "Hazard Analysis and Critical<br>Control Points"[Title/Abstract] OR "Patient Harm"[Title/Abstract]<br>OR "Patient Safety"[Title/Abstract] OR "Safety<br>Management"[Title/Abstract] OR "Home<br>Accident*"[Title/Abstract] |         |
| 6  | #4 OR #5                                                                                                                                                                                                                                                                                                                                                                            | 278,637 |
| 7  | "Fear"[Mesh]                                                                                                                                                                                                                                                                                                                                                                        | 35,295  |
| 8  | "fear*"[Title/Abstract] OR "Panic"[Title/Abstract]                                                                                                                                                                                                                                                                                                                                  | 104,099 |
| 9  | #7 OR #8                                                                                                                                                                                                                                                                                                                                                                            | 113,388 |
| 10 | #3 AND #6 AND #9                                                                                                                                                                                                                                                                                                                                                                    | 246     |

**Cochrane database Library: from inception to July 20, 2021**

| # | searches                                                                                                                                                                                                                                                                                                                                                                                                                                                                                   | results |
|---|--------------------------------------------------------------------------------------------------------------------------------------------------------------------------------------------------------------------------------------------------------------------------------------------------------------------------------------------------------------------------------------------------------------------------------------------------------------------------------------------|---------|
| 1 | [mh "Stroke"] OR [mh "Carotid Artery Diseases"] OR [mh<br>"Cerebrovascular Disorders"] OR [mh "Basal Ganglia<br>Cerebrovascular Disease"] OR [mh "Cerebral Infarction"] OR<br>[mh "Brain Ischemia"] OR [mh "Cerebral Small Vessel<br>Diseases"] OR [mh "Intracranial Arterial Diseases"] OR [mh<br>"Intracranial Hemorrhages"] OR [mh "Brain Infarction"] OR [mh<br>"stroke, lacunar"] OR [mh "vasospasm, intracranial"] OR [mh<br>"Hemiplegia"] OR [mh "Paresis"] OR [mh "gait disorders, | 17045   |

|   |                                                                                                                                                                                                                                                                                                                                                                                                                                                                                                                                                                                                                                                                                                                                                                                                                                                                                                                                                                                                                                                                                                                                                                                                                                      |       |
|---|--------------------------------------------------------------------------------------------------------------------------------------------------------------------------------------------------------------------------------------------------------------------------------------------------------------------------------------------------------------------------------------------------------------------------------------------------------------------------------------------------------------------------------------------------------------------------------------------------------------------------------------------------------------------------------------------------------------------------------------------------------------------------------------------------------------------------------------------------------------------------------------------------------------------------------------------------------------------------------------------------------------------------------------------------------------------------------------------------------------------------------------------------------------------------------------------------------------------------------------|-------|
|   | neurologic"]                                                                                                                                                                                                                                                                                                                                                                                                                                                                                                                                                                                                                                                                                                                                                                                                                                                                                                                                                                                                                                                                                                                                                                                                                         |       |
| 2 | (stroke* OR Cerebrovascular Accident* OR Cerebrovascular Apoplexy OR Brain Vascular Accident* OR Cerebrovascular Stroke* OR Apoplexy OR Cerebral Stroke* OR Acute Stroke* OR Acute Cerebrovascular Accident* OR Brain Stem Infarctions OR Cerebral Infarction OR Hemorrhagic Stroke OR Ischemic Stroke OR Embolic Stroke OR Thrombotic Stroke OR Cardiovascular Diseases OR Vascular Diseases OR Carotid Artery Disease* OR Carotid Artery Disorder* OR Carotid Arterial Disease* OR Carotid Atheroscleros* OR Carotid Atherosclerotic Disease* OR Internal Carotid Artery Diseases OR Common Carotid Artery Diseases OR External Carotid Artery Diseases OR External Carotid Arterial Diseases OR Carotid Artery Thrombosis OR Cerebrovascular Disorder* OR Intracranial Vascular Disease* OR Intracranial Vascular Disorder* OR Cerebrovascular Disease* OR Brain Vascular Disorder* OR Cerebrovascular Occlusion* OR Cerebrovascular Insufficienc* OR Basal Ganglia Vascular Disease* OR Lenticulostriate Vasculopath* OR Lenticulostriate Vascular Disease* OR Vascular Lenticulostriate Diseases OR Basal Ganglia Hemorrhage OR Putaminal Hemorrhage OR Cerebral Infarct* OR Left Hemisphere Cerebral Infarction OR Subcortical | 99308 |



|                                                                                                                                                                                                                                                                                                                                                                                                                                                                                                                                                                                                                                                                                                                                                                                                                                                                                                                                                                                                                                                                                                                                                                                                                                                                                                                         |
|-------------------------------------------------------------------------------------------------------------------------------------------------------------------------------------------------------------------------------------------------------------------------------------------------------------------------------------------------------------------------------------------------------------------------------------------------------------------------------------------------------------------------------------------------------------------------------------------------------------------------------------------------------------------------------------------------------------------------------------------------------------------------------------------------------------------------------------------------------------------------------------------------------------------------------------------------------------------------------------------------------------------------------------------------------------------------------------------------------------------------------------------------------------------------------------------------------------------------------------------------------------------------------------------------------------------------|
| <p>Infarction* OR Posterior Choroidal Artery Infarction OR Anterior Choroidal Artery Infarction OR Right Hemisphere Cerebral Infarction OR CADASIL OR Multi-Infarct Dementia OR Anterior Cerebral Artery Infarction OR Middle Cerebral Artery Infarction OR Posterior Cerebral Artery Infarction OR Brain Ischemia* OR Ischemic Encephalopath* OR Cerebral Ischemia* OR Brain Hypoxia-Ischemia OR Cerebral Small Vessel Disease* OR Cerebral Microangiopath* OR Intracranial Arterial Disease* OR Intracranial Arterial Disorder* OR Arterial Brain Disease* OR Brain Arterial Disease* OR Arterial Brain Disorder* OR Intracranial Hemorrhage* OR Posterior Fossa Hemorrhage* OR Brain Hemorrhage* OR Cerebral Hemorrhage OR Cerebral Intraventricular Hemorrhage OR Hypertensive Intracranial Hemorrhage OR Cranial Epidural Hematoma OR Subdural Hematoma OR Pituitary Apoplexy OR Subarachnoid Hemorrhage OR Brain Infarction* OR Brain Infarct* OR Anterior Circulation Brain Infarction OR Brain Venous Infarction* OR Anterior Cerebral Circulation Infarction OR Posterior Circulation Brain Infarction OR Lacunar Stroke* OR Lacunar Syndrome* OR Lacunar Infarction* OR Lacunar Infarct* OR Intracranial Vasospasm* OR Intracranial Angiospasm* OR Intracranial Vascular Spasm* OR Cerebral Vasospasm* OR</p> |
|-------------------------------------------------------------------------------------------------------------------------------------------------------------------------------------------------------------------------------------------------------------------------------------------------------------------------------------------------------------------------------------------------------------------------------------------------------------------------------------------------------------------------------------------------------------------------------------------------------------------------------------------------------------------------------------------------------------------------------------------------------------------------------------------------------------------------------------------------------------------------------------------------------------------------------------------------------------------------------------------------------------------------------------------------------------------------------------------------------------------------------------------------------------------------------------------------------------------------------------------------------------------------------------------------------------------------|

|   |                                                                                                                                                                                                                                                                                                                                                                                                                                                                                                                                                                                                                                                                                                                                                                                                                                                                                                                                                                                                                                               |        |
|---|-----------------------------------------------------------------------------------------------------------------------------------------------------------------------------------------------------------------------------------------------------------------------------------------------------------------------------------------------------------------------------------------------------------------------------------------------------------------------------------------------------------------------------------------------------------------------------------------------------------------------------------------------------------------------------------------------------------------------------------------------------------------------------------------------------------------------------------------------------------------------------------------------------------------------------------------------------------------------------------------------------------------------------------------------|--------|
|   | Cerebrovascular Spasm* OR Cerebral Angiospasm* OR Cerebral Artery Spasm* OR Hemiplegia* OR Transient Hemiplegia* OR Monoplegia* OR Post-Ictal Hemiplegia* OR Crossed Hemiplegia* OR Flaccid Hemiplegia* OR Infantile Hemiplegia* OR Spastic Hemiplegia* OR Pareses OR Paraparesis OR Muscular Pares* OR Muscle Pares* OR Monopares* OR Lower Extremity Pares* OR Crural Pares* OR Upper Extremity Pares* OR Brachial Pares* OR Hemipares* OR Spastic Paraparesis OR Neurologic Gait Disorder* OR Neurologic Locomotion Disorder* OR Neurologic Ambulation Disorder* OR Neurologic Gait Dysfunction* OR Duck Gait OR Sensorimotor Gait Disorder* OR Athetotic Gait OR Broadened Gait OR Drop Foot Gait OR Festinating Gait OR Frontal Gait OR Hemiplegic Gait OR Hysterical Gait OR Reeling Gait OR Rigid Gait OR Scissors Gait OR Shuffling Gait* OR Spastic Gait OR Stumbling Gait OR Unsteady Gait OR Widebased Gait OR Marche a Petit Pas OR Rapid Fatigue Gait OR Charcot Gait* OR Charcot* Gait OR Gait Apraxia OR Gait Ataxia):ti,ab,kw |        |
| 3 | #1 OR #2                                                                                                                                                                                                                                                                                                                                                                                                                                                                                                                                                                                                                                                                                                                                                                                                                                                                                                                                                                                                                                      | 100254 |
| 4 | [mh "Accidental Falls"] OR [mh "Accidents"] OR [mh "Accident Prevention"]                                                                                                                                                                                                                                                                                                                                                                                                                                                                                                                                                                                                                                                                                                                                                                                                                                                                                                                                                                     | 6089   |
| 5 | (Falls OR Falling OR Accidental Fall* OR Slip and Fall OR Fall                                                                                                                                                                                                                                                                                                                                                                                                                                                                                                                                                                                                                                                                                                                                                                                                                                                                                                                                                                                | 101648 |

|    |                                                                                                                                                                                                                                 |        |
|----|---------------------------------------------------------------------------------------------------------------------------------------------------------------------------------------------------------------------------------|--------|
|    | and Slip OR Accident Prevention OR Accidental Falls OR Home Accidents OR Accident Prevention* OR Hazard Analysis and Critical Control Points OR Patient Harm OR Patient Safety OR Safety Management OR Home Accident*):ti,ab,kw |        |
| 6  | #4 OR #5                                                                                                                                                                                                                        | 104168 |
| 7  | [mh "Fear"]                                                                                                                                                                                                                     | 1562   |
| 8  | (fear* OR Panic):ti,ab,kw                                                                                                                                                                                                       | 12288  |
| 9  | #7 OR #8                                                                                                                                                                                                                        | 12289  |
| 10 | #3 AND #6 AND #9                                                                                                                                                                                                                | 115    |

**Web of science: from inception to July 20, 2021**

| # | searches                                                                                                                                                                                                                                                                                                                                                                                                                                                                                                                                                                                                                        | results   |
|---|---------------------------------------------------------------------------------------------------------------------------------------------------------------------------------------------------------------------------------------------------------------------------------------------------------------------------------------------------------------------------------------------------------------------------------------------------------------------------------------------------------------------------------------------------------------------------------------------------------------------------------|-----------|
| 1 | TS=(Gait Disorders, Neurologic OR Paresis OR Vasospasm, Intracranial OR Stroke, Lacunar OR Basal Ganglia Cerebrovascular Disease OR stroke* OR Cerebrovascular Accident* OR Cerebrovascular Apoplexy OR Brain Vascular Accident* OR Cerebrovascular Stroke* OR Apoplexy OR Cerebral Stroke* OR Acute Stroke* OR Acute Cerebrovascular Accident* OR Brain Stem Infarctions OR Cerebral Infarction OR Hemorrhagic Stroke OR Ischemic Stroke OR Embolic Stroke OR Thrombotic Stroke OR Cardiovascular Diseases OR Vascular Diseases OR Carotid Artery Disease* OR Carotid Artery Disorder* OR Carotid Arterial Disease* OR Carotid | 3,756,024 |

|                                                                                                                                                                                                                                                                                                                                                                                                                                                                                                                                                                                                                                                                                                                                                                                                                                                                                                                                                                                                                                                                                                                                                                                                                                                                                                             |  |
|-------------------------------------------------------------------------------------------------------------------------------------------------------------------------------------------------------------------------------------------------------------------------------------------------------------------------------------------------------------------------------------------------------------------------------------------------------------------------------------------------------------------------------------------------------------------------------------------------------------------------------------------------------------------------------------------------------------------------------------------------------------------------------------------------------------------------------------------------------------------------------------------------------------------------------------------------------------------------------------------------------------------------------------------------------------------------------------------------------------------------------------------------------------------------------------------------------------------------------------------------------------------------------------------------------------|--|
| <p>Atheroscleros* OR Carotid Atherosclerotic Disease* OR Internal Carotid Artery Diseases OR Common Carotid Artery Diseases OR External Carotid Artery Diseases OR External Carotid Arterial Diseases OR Carotid Artery Thrombosis OR Cerebrovascular Disorder* OR Intracranial Vascular Disease* OR Intracranial Vascular Disorder* OR Cerebrovascular Disease* OR Brain Vascular Disorder* OR Cerebrovascular Occlusion* OR Cerebrovascular Insufficienc* OR Basal Ganglia Vascular Disease* OR Lenticulostriate Vasculopath* OR Lenticulostriate Vascular Disease* OR Vascular Lenticulostriate Diseases OR Basal Ganglia Hemorrhage OR Putaminal Hemorrhage OR Cerebral Infarct* OR Left Hemisphere Cerebral Infarction OR Subcortical Infarction* OR Posterior Choroidal Artery Infarction OR Anterior Choroidal Artery Infarction OR Right Hemisphere Cerebral Infarction OR CADASIL OR Multi-Infarct Dementia OR Anterior Cerebral Artery Infarction OR Middle Cerebral Artery Infarction OR Posterior Cerebral Artery Infarction OR Brain Ischemia* OR Ischemic Encephalopath* OR Cerebral Ischemia* OR Brain Hypoxia-Ischemia OR Cerebral Small Vessel Disease* OR Cerebral Microangiopath* OR Intracranial Arterial Disease* OR Intracranial Arterial Disorder* OR Arterial Brain Disease* OR</p> |  |
|-------------------------------------------------------------------------------------------------------------------------------------------------------------------------------------------------------------------------------------------------------------------------------------------------------------------------------------------------------------------------------------------------------------------------------------------------------------------------------------------------------------------------------------------------------------------------------------------------------------------------------------------------------------------------------------------------------------------------------------------------------------------------------------------------------------------------------------------------------------------------------------------------------------------------------------------------------------------------------------------------------------------------------------------------------------------------------------------------------------------------------------------------------------------------------------------------------------------------------------------------------------------------------------------------------------|--|

|                                                                                                                                                                                                                                                                                                                                                                                                                                                                                                                                                                                                                                                                                                                                                                                                                                                                                                                                                                                                                                                                                                                                                                                                                                                      |
|------------------------------------------------------------------------------------------------------------------------------------------------------------------------------------------------------------------------------------------------------------------------------------------------------------------------------------------------------------------------------------------------------------------------------------------------------------------------------------------------------------------------------------------------------------------------------------------------------------------------------------------------------------------------------------------------------------------------------------------------------------------------------------------------------------------------------------------------------------------------------------------------------------------------------------------------------------------------------------------------------------------------------------------------------------------------------------------------------------------------------------------------------------------------------------------------------------------------------------------------------|
| Brain Arterial Disease* OR Arterial Brain Disorder* OR Intracranial Hemorrhage* OR Posterior Fossa Hemorrhage* OR Brain Hemorrhage* OR Cerebral Hemorrhage OR Cerebral Intraventricular Hemorrhage OR Hypertensive Intracranial Hemorrhage OR Cranial Epidural Hematoma OR Subdural Hematoma OR Pituitary Apoplexy OR Subarachnoid Hemorrhage OR Brain Infarction* OR Brain Infarct* OR Anterior Circulation Brain Infarction OR Brain Venous Infarction* OR Anterior Cerebral Circulation Infarction OR Posterior Circulation Brain Infarction OR Lacunar Stroke* OR Lacunar Syndrome* OR Lacunar Infarction* OR Lacunar Infarct* OR Intracranial Vasospasm* OR Intracranial Angiospasm* OR Intracranial Vascular Spasm* OR Cerebral Vasospasm* OR Cerebrovascular Spasm* OR Cerebral Angiospasm* OR Cerebral Artery Spasm* OR Hemiplegia* OR Transient Hemiplegia* OR Monoplegia* OR Post-Ictal Hemiplegia* OR Crossed Hemiplegia* OR Flaccid Hemiplegia* OR Infantile Hemiplegia* OR Spastic Hemiplegia* OR Pareses OR Paraparesis OR Muscular Pares* OR Muscle Pares* OR Monopares* OR Lower Extremity Pares* OR Crural Pares* OR Upper Extremity Pares* OR Brachial Pares* OR Hemipares* OR Spastic Paraparesis OR Neurologic Gait Disorder* OR |
|------------------------------------------------------------------------------------------------------------------------------------------------------------------------------------------------------------------------------------------------------------------------------------------------------------------------------------------------------------------------------------------------------------------------------------------------------------------------------------------------------------------------------------------------------------------------------------------------------------------------------------------------------------------------------------------------------------------------------------------------------------------------------------------------------------------------------------------------------------------------------------------------------------------------------------------------------------------------------------------------------------------------------------------------------------------------------------------------------------------------------------------------------------------------------------------------------------------------------------------------------|

|   |                                                                                                                                                                                                                                                                                                                                                                                                                                                                                                                                     |           |
|---|-------------------------------------------------------------------------------------------------------------------------------------------------------------------------------------------------------------------------------------------------------------------------------------------------------------------------------------------------------------------------------------------------------------------------------------------------------------------------------------------------------------------------------------|-----------|
|   | Neurologic Locomotion Disorder* OR Neurologic Ambulation Disorder* OR Neurologic Gait Dysfunction* OR Duck Gait OR Sensorimotor Gait Disorder* OR Athetotic Gait OR Broadened Gait OR Drop Foot Gait OR Festinating Gait OR Frontal Gait OR Hemiplegic Gait OR Hysterical Gait OR Reeling Gait OR Rigid Gait OR Scissors Gait OR Shuffling Gait* OR Spastic Gait OR Stumbling Gait OR Unsteady Gait OR Widebased Gait OR Marche a Petit Pas OR Rapid Fatigue Gait OR Charcot Gait* OR Charcot* Gait OR Gait Apraxia OR Gait Ataxia) |           |
| 2 | TS=(Accidents OR Accidents,Home OR Falls OR Falling OR Accidental Fall* OR Slip and Fall OR Fall and Slip OR Accident Prevention OR Home Accidents OR Accident Prevention* OR Hazard Analysis and Critical Control Points OR Patient Harm OR Patient Safety OR Safety Management OR Home Accident*)                                                                                                                                                                                                                                 | 1,584,808 |
| 3 | TS=(fear* OR Panic)                                                                                                                                                                                                                                                                                                                                                                                                                                                                                                                 | 217,740   |
| 4 | #1 AND #2 AND #3                                                                                                                                                                                                                                                                                                                                                                                                                                                                                                                    | 1055      |

**CINAHL (Ebsco): from inception to July 20, 2021**

| # | searches                                                                                                                                                      | results |
|---|---------------------------------------------------------------------------------------------------------------------------------------------------------------|---------|
| 1 | (MH "stroke patients") OR (MH "stroke units") OR (MH "Stroke+") OR (MH "Carotid Artery Diseases+") OR (MH "Cerebrovascular Disorders+") OR (MH "Basal Ganglia | 19,393  |

|   |                                                                                                                                                                                                                                                                                                                                                                                                                                                                                                                                                                                                                                                                                                                                                                                                                                                                                                                                                                              |        |
|---|------------------------------------------------------------------------------------------------------------------------------------------------------------------------------------------------------------------------------------------------------------------------------------------------------------------------------------------------------------------------------------------------------------------------------------------------------------------------------------------------------------------------------------------------------------------------------------------------------------------------------------------------------------------------------------------------------------------------------------------------------------------------------------------------------------------------------------------------------------------------------------------------------------------------------------------------------------------------------|--------|
|   | Cerebrovascular Disease+") OR (MH "Cerebral Infarction") OR (MH "Cerebral Ischemia+") OR (MH "Cerebral Small Vessel Diseases+") OR (MH "Intracranial Arterial Diseases+") OR (MH "Intracranial Hemorrhage+") OR (MH "Hypoxia, Brain+") OR (MH "stroke, lacunar") OR (MH "Hemiplegia") OR (MH "gait disorders, neurologic+")                                                                                                                                                                                                                                                                                                                                                                                                                                                                                                                                                                                                                                                  |        |
| 2 | "Hypoxia, Brain" OR stroke* OR "Cerebrovascular Accident*" OR "Cerebrovascular Apoplexy" OR "Brain Vascular Accident*" OR "Cerebrovascular Stroke*" OR "Apoplexy" OR "Cerebral Stroke*" OR "Acute Stroke*" OR "Acute Cerebrovascular Accident*" OR "Brain Stem Infarctions" OR "Cerebral Infarction" OR "Hemorrhagic Stroke" OR "Ischemic Stroke" OR "Embolic Stroke" OR "Thrombotic Stroke" OR "Cardiovascular Diseases" OR "Vascular Diseases" OR "Carotid Artery Disease*" OR "Carotid Artery Disorder*" OR "Carotid Arterial Disease*" OR "Carotid Atherosclerosis*" OR "Carotid Atherosclerotic Disease*" OR "Internal Carotid Artery Diseases" OR "Common Carotid Artery Diseases" OR "External Carotid Artery Diseases" OR "External Carotid Arterial Diseases" OR "Carotid Artery Thrombosis" OR "Cerebrovascular Disorder*" OR "Intracranial Vascular Disease*" OR "Intracranial Vascular Disorder*" OR "Cerebrovascular Disease*" OR "Brain Vascular Disorder*" OR | 38,873 |

|                                                                                                                                                                                                                                                                                                                                                                                                                                                                                                                                                                                                                                                                                                                                                                                                                                                                                                                                                                                                                                                                                                                                                                                                                                                                                                                 |
|-----------------------------------------------------------------------------------------------------------------------------------------------------------------------------------------------------------------------------------------------------------------------------------------------------------------------------------------------------------------------------------------------------------------------------------------------------------------------------------------------------------------------------------------------------------------------------------------------------------------------------------------------------------------------------------------------------------------------------------------------------------------------------------------------------------------------------------------------------------------------------------------------------------------------------------------------------------------------------------------------------------------------------------------------------------------------------------------------------------------------------------------------------------------------------------------------------------------------------------------------------------------------------------------------------------------|
| <p>"Cerebrovascular Occlusion*" OR "Cerebrovascular Insufficienc*" OR "Basal Ganglia Vascular Disease*" OR "Lenticulostrate Vasculopath*" OR "Lenticulostrate Vascular Disease*" OR "Vascular Lenticulostrate Diseases" OR "Basal Ganglia Hemorrhage" OR "Putaminal Hemorrhage" OR "Cerebral Infarct*" OR "Left Hemisphere Cerebral Infarction" OR "Subcortical Infarction*" OR "Posterior Choroidal Artery Infarction" OR "Anterior Choroidal Artery Infarction" OR "Right Hemisphere Cerebral Infarction" OR "CADASIL" OR "Multi-Infarct Dementia" OR "Anterior Cerebral Artery Infarction" OR "Middle Cerebral Artery Infarction" OR "Posterior Cerebral Artery Infarction" OR "Brain Ischemia*" OR "Ischemic Encephalopath*" OR "Cerebral Ischemia*" OR "Brain Hypoxia-Ischemia" OR "Cerebral Small Vessel Disease*" OR "Cerebral Microangiopath*" OR "Intracranial Arterial Disease*" OR "Intracranial Arterial Disorder*" OR "Arterial Brain Disease*" OR "Brain Arterial Disease*" OR "Arterial Brain Disorder*" OR "Intracranial Hemorrhage*" OR "Posterior Fossa Hemorrhage*" OR "Brain Hemorrhage*" OR "Cerebral Hemorrhage" OR "Cerebral Intraventricular Hemorrhage" OR "Hypertensive Intracranial Hemorrhage" OR "Cranial Epidural Hematoma" OR "Subdural Hematoma" OR "Pituitary Apoplexy" OR</p> |
|-----------------------------------------------------------------------------------------------------------------------------------------------------------------------------------------------------------------------------------------------------------------------------------------------------------------------------------------------------------------------------------------------------------------------------------------------------------------------------------------------------------------------------------------------------------------------------------------------------------------------------------------------------------------------------------------------------------------------------------------------------------------------------------------------------------------------------------------------------------------------------------------------------------------------------------------------------------------------------------------------------------------------------------------------------------------------------------------------------------------------------------------------------------------------------------------------------------------------------------------------------------------------------------------------------------------|



|                                                                                                                                                                                                                                                                                                                                                                                                                                                                                                                                                                                                                                                                                                                                                                                                                                                                                                                                                                                                                                                                                                                                                                                                                                                                                                                                   |
|-----------------------------------------------------------------------------------------------------------------------------------------------------------------------------------------------------------------------------------------------------------------------------------------------------------------------------------------------------------------------------------------------------------------------------------------------------------------------------------------------------------------------------------------------------------------------------------------------------------------------------------------------------------------------------------------------------------------------------------------------------------------------------------------------------------------------------------------------------------------------------------------------------------------------------------------------------------------------------------------------------------------------------------------------------------------------------------------------------------------------------------------------------------------------------------------------------------------------------------------------------------------------------------------------------------------------------------|
| <p>"Subarachnoid Hemorrhage" OR "Brain Infarction*" OR "Brain Infarct*" OR "Anterior Circulation Brain Infarction" OR "Brain Venous Infarction*" OR "Anterior Cerebral Circulation Infarction" OR "Posterior Circulation Brain Infarction" OR "Lacunar Stroke*" OR "Lacunar Syndrome*" OR "Lacunar Infarction*" OR "Lacunar Infarct*" OR "Intracranial Vasospasm*" OR "Intracranial Angiospasm*" OR "Intracranial Vascular Spasm*" OR "Cerebral Vasospasm*" OR "Cerebrovascular Spasm*" OR "Cerebral Angiospasm*" OR "Cerebral Artery Spasm*" OR "Hemiplegia*" OR "Transient Hemiplegia*" OR "Monoplegia*" OR "Post-Ictal Hemiplegia*" OR "Crossed Hemiplegia*" OR "Flaccid Hemiplegia*" OR "Infantile Hemiplegia*" OR "Spastic Hemiplegia*" OR "Pareses" OR "Paraparesis" OR "Muscular Pares*" OR "Muscle Pares*" OR "Monopares*" OR "Lower Extremity Pares*" OR "Crural Pares*" OR "Upper Extremity Pares*" OR "Brachial Pares*" OR "Hemipares*" OR "Spastic Paraparesis" OR "Neurologic Gait Disorder*" OR "Neurologic Locomotion Disorder*" OR "Neurologic Ambulation Disorder*" OR "Neurologic Gait Dysfunction*" OR "Duck Gait" OR "Sensorimotor Gait Disorder*" OR "Athetotic Gait OR Broadened Gait" OR "Drop Foot Gait" OR "Festinating Gait" OR "Frontal Gait" OR "Hemiplegic Gait" OR "Hysterical Gait" OR Reeling</p> |
|-----------------------------------------------------------------------------------------------------------------------------------------------------------------------------------------------------------------------------------------------------------------------------------------------------------------------------------------------------------------------------------------------------------------------------------------------------------------------------------------------------------------------------------------------------------------------------------------------------------------------------------------------------------------------------------------------------------------------------------------------------------------------------------------------------------------------------------------------------------------------------------------------------------------------------------------------------------------------------------------------------------------------------------------------------------------------------------------------------------------------------------------------------------------------------------------------------------------------------------------------------------------------------------------------------------------------------------|

|    |                                                                                                                                                                                                                                                                                                     |        |
|----|-----------------------------------------------------------------------------------------------------------------------------------------------------------------------------------------------------------------------------------------------------------------------------------------------------|--------|
|    | Gait" OR "Rigid Gait" OR "Scissors Gait" OR "Shuffling Gait*" OR "Spastic Gait" OR "Stumbling Gait" OR "Unsteady Gait" OR "Widebased Gait" OR "Marche a Petit Pas" OR "Rapid Fatigue Gait" OR "Charcot Gait*" OR "Charcot* Gait" OR "Gait Apraxia" OR "Gait Ataxia"                                 |        |
| 3  | S1 OR S2                                                                                                                                                                                                                                                                                            | 40,724 |
| 4  | (MH "Fall Prevention (Iowa NIC)") OR (MH "Fall Risk (Saba CCC)") OR (MH "Fall Risk Assessment Tool") OR (MH "Hendrich Fall Risk Model") OR (MH "Morse Fall Scale") OR (MH "Safety Behavior: Fall Prevention (Iowa NOC)") OR (MH "Accidental Falls")                                                 | 5,446  |
| 5  | fall* OR Falling OR "Accident Prevention" OR "Home Accidents" OR "Accident Prevention*" OR "Hazard Analysis and Critical Control Points" OR "Patient Harm" OR "Patient Safety" OR "Safety Management" OR "Home Accident*" OR "near-fall" OR slip* OR trip* OR stumble* OR tumble* OR "lose footing" | 46,176 |
| 6  | S4 OR S5                                                                                                                                                                                                                                                                                            | 51,519 |
| 7  | (MH "Phobic Disorders+") OR (MH "Fear (NANDA)") OR (MH "Fear Control (Iowa NOC)") OR (MH "Fear (Saba CCC)") OR (MH "Fear+")                                                                                                                                                                         | 4604   |
| 8  | fear* OR Panic OR fright* OR afraid                                                                                                                                                                                                                                                                 | 12,992 |
| 9  | S7 OR S8                                                                                                                                                                                                                                                                                            | 13,571 |
| 10 | S3 AND S6 AND S9                                                                                                                                                                                                                                                                                    | 31     |

**PsycINFO (Ovid): from APA PsycInfo1806 to 1966; APA PsycInfo1987 to January Week 3 2021--- from inception to July 20, 2021**

| # | searches                                                                                                                                                                                                                                                                                                                                                                                                            | results |
|---|---------------------------------------------------------------------------------------------------------------------------------------------------------------------------------------------------------------------------------------------------------------------------------------------------------------------------------------------------------------------------------------------------------------------|---------|
| 1 | exp Ataxia/ or exp Basal Ganglia/ or exp Brain Disorders/ or exp Carotid Arteries/ or exp Cerebral Hemorrhage/ or exp Cerebral Ischemia/ or exp Cerebrovascular Accidents/ or exp Cerebrovascular Disorders/ or exp Gait/ or exp General Paresis/ or exp Hemiplegia/ or exp Movement Disorders/ or exp Paralysis/ or exp Cognitive Rehabilitation/ or exp Risk Factors/ or exp Thromboses/ or exp Vasoconstriction/ | 326126  |
| 2 | exp Accident Prevention/ or exp Aging/ or exp Accidents/ or exp Cerebrovascular Accidents/ or exp Equilibrium/ or exp Falls/                                                                                                                                                                                                                                                                                        | 109963  |
| 3 | exp Fear/ or exp Conditioned Fear/ or exp Panic Attack/ or exp Panic/ or exp Panic Disorder/ or exp Anxiety                                                                                                                                                                                                                                                                                                         | 87289   |
| 4 | 1 and 2 and 3                                                                                                                                                                                                                                                                                                                                                                                                       | 347     |

**Embase: from inception to July 20, 2021**

| # | searches                                                                                                                                                                                                                                                                    | results |
|---|-----------------------------------------------------------------------------------------------------------------------------------------------------------------------------------------------------------------------------------------------------------------------------|---------|
| 1 | 'cerebrovascular accident'/exp OR 'basal ganglion hemorrhage'/exp OR 'brain hematoma'/exp OR 'brain hemorrhage'/exp OR 'brain infarction'/exp OR 'brain ischemia'/exp OR 'carotid artery disease'/exp OR 'cerebral artery disease'/exp OR 'cerebrovascular accident'/exp OR | 788,888 |

|   |                                                                                                                                                                                                                                                                                                                                                                                                                                                                                                                                                                                                                                                                                                                                                                                                                                                                                                                                                                                                                                                                                                          |         |
|---|----------------------------------------------------------------------------------------------------------------------------------------------------------------------------------------------------------------------------------------------------------------------------------------------------------------------------------------------------------------------------------------------------------------------------------------------------------------------------------------------------------------------------------------------------------------------------------------------------------------------------------------------------------------------------------------------------------------------------------------------------------------------------------------------------------------------------------------------------------------------------------------------------------------------------------------------------------------------------------------------------------------------------------------------------------------------------------------------------------|---------|
|   | 'intracranial aneurysm'/exp OR 'occlusive cerebrovascular disease'/exp OR 'vertebrobasilar insufficiency'/exp OR 'brain embolism'/exp OR 'brain vasospasm'/exp OR 'artery dissection'/exp OR 'hemiplegia'/exp OR 'stroke patient'/exp OR 'stroke unit'/exp OR 'paresis'/exp OR 'gait disorder'/exp                                                                                                                                                                                                                                                                                                                                                                                                                                                                                                                                                                                                                                                                                                                                                                                                       |         |
| 2 | 'abnormal gait':ab,ti OR 'acute cerebrovascular lesion':ab,ti OR 'acute focal cerebral vasculopathy':ab,ti OR 'apoplex*':ab,ti OR 'arteria vertebrobasillaris insufficiency':ab,ti OR 'arterial dissection':ab,ti OR 'basal gangli* cerebrovascular disease':ab,ti OR 'basal ganglia haemorrhage':ab,ti OR 'basal ganglion haemorrhage':ab,ti OR 'brachial basilar insufficiency':ab,ti OR 'brain accident':ab,ti OR 'brain attack':ab,ti OR 'brain arterial insufficiency':ab,ti OR 'brain artery obstruction':ab,ti OR 'brain artery occlusion':ab,ti OR 'brain artery thrombosis':ab,ti OR 'brain bleeding':ab,ti OR 'brain blood flow disturbance':ab,ti OR 'brain circulation disorder':ab,ti OR 'brain embolus':ab,ti OR 'brain haematoma':ab,ti OR 'brain haemorrhage':ab,ti OR 'brain infarct*':ab,ti OR 'brain insult*':ab,ti OR 'brain isch*emic attack':ab,ti OR 'brain ischaemia':ab,ti OR 'brain microh*emorrhage':ab,ti OR 'brain phlebothrombosis':ab,ti OR 'brain thrombo*':ab,ti OR 'brain vascular accident':ab,ti OR 'brain vascular obstruction':ab,ti OR 'brain vasospasm':ab,ti OR | 551,619 |

|                                                                                                                                                                                                                                                                                                                                                                                                                                                                                                                                                                                                                                                                                                                                                                                                                                                                                                                                                                                                                                                                                                                                                                                                                                                                                                                                                                                                                                                                                               |
|-----------------------------------------------------------------------------------------------------------------------------------------------------------------------------------------------------------------------------------------------------------------------------------------------------------------------------------------------------------------------------------------------------------------------------------------------------------------------------------------------------------------------------------------------------------------------------------------------------------------------------------------------------------------------------------------------------------------------------------------------------------------------------------------------------------------------------------------------------------------------------------------------------------------------------------------------------------------------------------------------------------------------------------------------------------------------------------------------------------------------------------------------------------------------------------------------------------------------------------------------------------------------------------------------------------------------------------------------------------------------------------------------------------------------------------------------------------------------------------------------|
| <p>'carotid arterial disorders':ab,ti OR 'carotid arteriopathy':ab,ti OR<br/>'carotid artery dis*':ab,ti OR 'carotid disease':ab,ti OR 'cerebral<br/>apoplexia':ab,ti OR 'cerebral artery occlusion':ab,ti OR 'cerebral<br/>artery thrombosis':ab,ti OR 'cerebral blood circulation<br/>disorder':ab,ti OR 'cerebral blood flow disorder':ab,ti OR<br/>'cerebral circulat* disorder':ab,ti OR 'cerebral emboli*':ab,ti OR<br/>'cerebral haematoma':ab,ti OR 'cerebral haemorrhage':ab,ti OR<br/>'cerebral infarct*':ab,ti OR 'cerebral insult':ab,ti OR 'cerebral<br/>isch*emia':ab,ti OR 'cerebral microbleed':ab,ti OR 'cerebral<br/>thrombosis':ab,ti OR 'cerebral vascular accident':ab,ti OR<br/>'cerebral vascular insufficiency':ab,ti OR 'cerebral<br/>vasospasm':ab,ti OR 'cerebro vascular accident':ab,ti OR<br/>'cerebrovascular accident':ab,ti OR 'cerebrovascular arrest':ab,ti<br/>OR 'cerebrovascular circulation disorder':ab,ti OR<br/>'cerebrovascular embolism':ab,ti OR 'cerebrovascular<br/>failure':ab,ti OR 'cerebrovascular infarction':ab,ti OR<br/>'cerebrovascular injury':ab,ti OR 'cerebrovascular insu*':ab,ti OR<br/>'cerebrovascular insu*':ab,ti OR 'cerebrovascular isch*emia':ab,ti<br/>OR 'cerebrovascular obliteration':ab,ti OR 'cerebrovascular<br/>obstruction':ab,ti OR 'cerebrovascular occlusion':ab,ti OR<br/>'cerebrovascular thrombosis':ab,ti OR 'cerebrum embolism':ab,ti<br/>OR 'cerebrum vascular accident':ab,ti OR 'corpus callosum</p> |
|-----------------------------------------------------------------------------------------------------------------------------------------------------------------------------------------------------------------------------------------------------------------------------------------------------------------------------------------------------------------------------------------------------------------------------------------------------------------------------------------------------------------------------------------------------------------------------------------------------------------------------------------------------------------------------------------------------------------------------------------------------------------------------------------------------------------------------------------------------------------------------------------------------------------------------------------------------------------------------------------------------------------------------------------------------------------------------------------------------------------------------------------------------------------------------------------------------------------------------------------------------------------------------------------------------------------------------------------------------------------------------------------------------------------------------------------------------------------------------------------------|

|   |                                                                                                                                                                                                                                                                                                                                                                                                                                                                                                                                                                                                                                                                                                                                                                                                                                                                                                                                                                                                                                                                                                                                                                                                                                                                                                     |         |
|---|-----------------------------------------------------------------------------------------------------------------------------------------------------------------------------------------------------------------------------------------------------------------------------------------------------------------------------------------------------------------------------------------------------------------------------------------------------------------------------------------------------------------------------------------------------------------------------------------------------------------------------------------------------------------------------------------------------------------------------------------------------------------------------------------------------------------------------------------------------------------------------------------------------------------------------------------------------------------------------------------------------------------------------------------------------------------------------------------------------------------------------------------------------------------------------------------------------------------------------------------------------------------------------------------------------|---------|
|   | <p>bleeding':ab,ti OR 'corpus callosum haemorrhage':ab,ti OR 'cortical infarction':ab,ti OR 'cva':ab,ti OR encephalorrhagia:ab,ti OR 'gait deviation*':ab,ti OR 'hematencephalon':ab,ti OR hemip*:ab,ti OR 'hemisphere infarct*':ab,ti OR 'interhemispheric hematoma':ab,ti OR 'intracerebral bleeding':ab,ti OR 'intracerebral haematoma':ab,ti OR 'intracerebral haemorrhage':ab,ti OR 'intracortical hemorrhage':ab,ti OR 'intracranial aneurysm':ab,ti OR 'intracranial artery thrombosis':ab,ti OR 'intracranial bleeding':ab,ti OR 'intracranial embolism':ab,ti OR 'intracranial hematoma':ab,ti OR 'intracranial hemorrhage':ab,ti OR 'intracranial thrombosis':ab,ti OR 'intracranial vasospasm':ab,ti OR 'isch*emic cerebral attack':ab,ti OR 'isch*emic seizure':ab,ti OR 'ische*mia cerebri':ab,ti OR 'isch*emic brain disease':ab,ti OR 'isch*emic encephalopathy':ab,ti OR 'musc* paresis':ab,ti OR 'neural isch*emia':ab,ti OR 'occlusive cerebrovascular disease':ab,ti OR 'paretic muscle':ab,ti OR 'partial paralysis':ab,ti OR stroke:ab,ti OR 'thrombosis cerebri':ab,ti OR 'vertebral basilar insufficiency':ab,ti OR 'vertebrobasilar artery insufficiency':ab,ti OR 'vertebrobasilar disease':ab,ti OR 'vertebrobasilar isch*':ab,ti OR 'vertebrobasilar syndrome':ab,ti</p> |         |
| 3 | 1 or 2                                                                                                                                                                                                                                                                                                                                                                                                                                                                                                                                                                                                                                                                                                                                                                                                                                                                                                                                                                                                                                                                                                                                                                                                                                                                                              | 914,196 |

|   |                                                                                                                                                                                                                                                                                                                                                                                                     |         |
|---|-----------------------------------------------------------------------------------------------------------------------------------------------------------------------------------------------------------------------------------------------------------------------------------------------------------------------------------------------------------------------------------------------------|---------|
| 4 | 'falling'/exp OR 'accident prevention'/exp OR 'accident proneness'/exp OR 'disaster planning'/exp OR 'medical countermeasure'/exp OR 'home accident'/exp                                                                                                                                                                                                                                            | 76,482  |
| 5 | 'accidental falls':ab,ti OR fall*:ab,ti OR 'injury prevention':ab,ti OR 'accident prevention':ab,ti OR 'accident neurosis':ab,ti OR 'accident proneness':ab,ti OR 'medical countermeasure*':ab,ti OR 'domestic accident':ab,ti OR 'home accident*':ab,ti OR 'falls-efficacy scale':ab,ti OR near-fall:ab,ti OR slip*:ab,ti OR trip*:ab,ti OR stumble*:ab,ti OR 'lose footing':ab,ti OR tumble:ab,ti | 644,144 |
| 6 | 4 or 5                                                                                                                                                                                                                                                                                                                                                                                              | 687,599 |
| 7 | 'fear'/exp OR 'anxiety'/exp OR 'anticipatory anxiety'/exp OR 'fear of falling'/exp OR 'fear of missing out'/exp OR 'performance anxiety'/exp OR 'fear conditioning test'/exp OR 'frustration'/exp OR 'patient worry'/exp OR 'grief'/exp OR 'hopelessness'/exp OR 'helplessness'/exp OR 'mental irritation'/exp OR 'panic'/exp                                                                       | 341,289 |
| 8 | Fear:ab,ti OR fright:ab,ti OR afraid:ab,ti OR 'fear of falling':ab,ti OR 'Falls Efficacy Scale':ab,ti OR 'Mobility Efficacy Scale':ab,ti OR 'Survey of Activities and Fear of Falling in the Elderly':ab,ti OR 'University of Illinois at Chicago Fear of Falling Measure':ab,ti OR 'SAFFE':ab,ti OR 'UICFFM':ab,ti OR 'Activities Specific Balance                                                 | 129,871 |

|    |                                                                                                                                                                                                                                                                                                                                                                                                         |         |
|----|---------------------------------------------------------------------------------------------------------------------------------------------------------------------------------------------------------------------------------------------------------------------------------------------------------------------------------------------------------------------------------------------------------|---------|
|    | Confidence Scale':ab,ti OR 'Confidence in Maintaining Balance Scale':ab,ti OR 'CON-Fbal':ab,ti OR basophobia:ab,ti OR 'fear of walking':ab,ti OR 'fears of missing out':ab,ti OR 'FOMO (fear)':ab,ti OR 'fear conditioning procedure':ab,ti OR worry:ab,ti OR 'worry (patient)':ab,ti OR grieving:ab,ti OR despair:ab,ti OR 'mental irritation':ab,ti OR 'panic attack':ab,ti OR 'panic disorder':ab,ti |         |
| 9  | 7 or 8                                                                                                                                                                                                                                                                                                                                                                                                  | 393,516 |
| 10 | 3 and 6 and 9                                                                                                                                                                                                                                                                                                                                                                                           | 825     |
