# Supplementary material for: Risk factors for fear of falling in stroke patients: a systematic review and meta-analysis
Source: HighWire-hosted journal article supplement (doi:10.1136/bmjopen-2021-056340), 2022-06-01
Supplement: bmjopen-2021-056340supp002_data_supplement.pdf [file bmjopen-2021-056340supp002_data_supplement.pdf]

| #  | Author        | Year | Title                                                                                                                                           | Include (yes)/ Exclude (no) | The cause of excluding                         |
|----|---------------|------|-------------------------------------------------------------------------------------------------------------------------------------------------|-----------------------------|------------------------------------------------|
| 1  | Zhang Qin     | 2020 | Influencing factors of fear of falling in patients with first cerebral infarction in recovery period                                            | yes                         |                                                |
| 2  | Song Na       | 2020 | Influencing factors and nursing countermeasures of falling fear in patients with cerebral apoplexy                                              | no                          | Total quality evaluation score $\leq 3$ points |
| 3  | Luo Li-Lei    | 2020 | Research status of falling fear in patients with cerebral infarction                                                                            | no                          | Review                                         |
| 4  | Xu Yan-Hua    | 2019 | Correlation of walking gait characteristics and fear of falling in patients with acute ischemic stroke and hemiplegia                           | no                          | Irrelevant outcome indicators                  |
| 5  | Li Jing       | 2019 | Study on the influence and the risk factors in Chengdu community post-stroke patients                                                           | no                          | Irrelevant research object                     |
| 6  | Sun Hong-Yan  | 2017 | Correlation between fear of falling and quality of life in patients with first stroke                                                           | no                          | Irrelevant research object                     |
| 7  | Zhang Di      | 2016 | Study on epidemiology of incidence and risk factors of falls in rural community-dwelling older population in Beijing                            | no                          | Irrelevant research object                     |
| 8  | Deng Ning     | 2016 | A follow-up study : Fear of Falling among patients with first ever cerebral infarction and its related factors                                  | no                          | Irrelevant outcome indicators                  |
| 9  | Cong Yan      | 2016 | Risk Factors of Falls in Elderly Patients With Stroke and the Experience of Comprehensive Nursing Intervention                                  | no                          | Irrelevant research object                     |
| 10 | Li Ying       | 2014 | The current status and influencing factors of fear of falling among the stroke older patients                                                   | yes                         |                                                |
| 11 | Guan, Q.      | 2013 | Factors influencing fear of falling in patients with stroke                                                                                     | no                          | Irrelevant outcome indicators                  |
| 12 | Hu Bei        | 2009 | Risk factors and nursing intervention of falls with stroke patients                                                                             | no                          | Irrelevant                                     |
| 13 | Li Ming-e     | 2008 | Risk factors and nursing intervention for falls in the aged                                                                                     | no                          | Irrelevant research object                     |
| 14 | Yadav, T.     | 2020 | Factors affecting fear of falls in patients with chronic stroke                                                                                 | yes                         |                                                |
| 15 | Duran, A. T.  | 2020 | Ptsd Symptoms and Its Association with Fear of Falling and Subsequent Activity Restriction in Patients with Tia/Stroke                          | no                          | Conference abstract                            |
| 16 | Aguiar, L. T. | 2020 | Perspectives, satisfaction, self-efficacy, and barriers to aerobic exercise reported by individuals with chronic stroke in a developing country | no                          | Irrelevant research object                     |

|    |                 |      |                                                                                                                                                                                   |     |                               |
|----|-----------------|------|-----------------------------------------------------------------------------------------------------------------------------------------------------------------------------------|-----|-------------------------------|
| 17 | Tashiro, H.     | 2019 | Life-Space Mobility and Relevant Factors in Community-dwelling Individuals with Stroke in Japan: A Cross-sectional Study                                                          | no  | Irrelevant research object    |
| 18 | Persson, C. U.  | 2019 | Prediction of physical activity level after mild stroke: A 6-month followup of 215 patients in the fall study of gothenburg (fallsgot)                                            | no  | Conference abstract           |
| 19 | Liu, Tai-Wa     | 2019 | The reliability and validity of the Survey of Activities and Fear of Falling in the Elderly for assessing fear and activity avoidance among stroke survivors. [References]        | no  | Irrelevant research object    |
| 20 | Hanna, E.       | 2019 | Participation, Fear of Falling, and Upper Limb Impairment are Associated with High Sitting Time in People with Stroke                                                             | no  | Irrelevant outcome indicators |
| 21 | Sertel, M.      | 2018 | Investigation of the relationship between balance and fear of falling and movement in stroke patients                                                                             | no  | Conference abstract           |
| 22 | Saygili, F.     | 2018 | Relationship between fear of falls, daily living activities, and trunk control in stroke patients                                                                                 | no  | Full text not found           |
| 23 | Rafsten, L.     | 2018 | Perceived and assessed balance in patients with stroke within 24 hours after discharge to home                                                                                    | no  | Conference abstract           |
| 24 | Mansfield, A.   | 2018 | stroke                                                                                                                                                                            | no  | Handbook                      |
| 25 | Larén, A.       | 2018 | Fear of falling in acute stroke: The Fall Study of Gothenburg (FallsGOT)                                                                                                          | yes |                               |
| 26 | Janssen, H.     | 2018 | Participation, fear of falling and upper limb impairment is associated with high sitting time in people with stroke                                                               | no  | Duplicate data                |
| 27 | Chun, H. Y. Y.  | 2018 | Fear of falling is independently associated with agoraphobia after mild stroke and transient ischaemic attack                                                                     | no  | Conference abstract           |
| 28 | Chun, H. Y. Y.  | 2018 | Fear of falling is independently associated with agoraphobia after mild stroke and TIA                                                                                            | no  | Conference abstract           |
| 29 | Van Dijk, M. M. | 2017 | A cross-sectional study comparing lateral and diagonal maximum weight shift in people with stroke and healthy controls and the correlation with balance, gait and fear of falling | no  | Irrelevant research object    |
| 30 | Stout, R. D.    | 2017 | Fear of falling for older and stroke-involved adults                                                                                                                              | no  | Full text not found           |
| 31 | Oguz, S.        | 2017 | The relationship between objective balance, perceived sense of balance, and fear of falling in stroke patients                                                                    | no  | Irrelevant outcome indicators |

|    |                        |      |                                                                                                                                                     |     |                               |
|----|------------------------|------|-----------------------------------------------------------------------------------------------------------------------------------------------------|-----|-------------------------------|
| 32 | Ng, S.                 | 2017 | Fear of falling in patients with chronic stroke                                                                                                     | no  | Irrelevant research object    |
| 33 | Larén, A.              | 2017 | Fear of falling acute after stroke: A part of the fall study in Gothenburg                                                                          | no  | Conference abstract           |
| 34 | Goz, E.                | 2017 | Relationship between fall frequency and fear of fall, motor function and disability in geriatric and nongeriatric stroke patients                   | no  | Conference abstract           |
| 35 |                        |      |                                                                                                                                                     | no  | Conference abstract           |
| 36 | Schinkel-Ivy, A.       | 2016 | Relationships between fear of falling, balance confidence, and control of balance, gait, and reactive stepping in individuals with sub-acute stroke | yes |                               |
| 37 | Nct,                   | 2016 | Fear of Falling in Patients With Chronic Stroke                                                                                                     | no  | Irrelevant research object    |
| 38 | Kavian, M.             | 2016 | The correlation between the standing stability and fear of falling in patients with stroke                                                          | no  | Full text not found           |
| 39 | Goh, H. T.             | 2016 | Falls and Fear of Falling After Stroke: A Case-Control Study                                                                                        | yes |                               |
| 40 | Visschedijk, J. H. M.  | 2015 | Longitudinal follow-up study on fear of falling during and after rehabilitation in skilled nursing facilities                                       | no  | Irrelevant research object    |
| 41 | Schmid, Arlene A.      | 2015 | Fear of Falling in People With Chronic Stroke                                                                                                       | no  | Irrelevant outcome indicators |
| 42 | Schlick, C.            | 2015 | Falls and fear of falling in vertigo and balance disorders: A controlled cross-sectional study                                                      | no  | Irrelevant outcome indicators |
| 43 | Loureiro, A. P. C.     | 2015 | Sedentary behaviors in stroke survivors                                                                                                             | no  | Conference abstract           |
| 44 | Jones, Valerie         | 2015 | Fear of Falling Among Persons With Chronic Stroke...AOTA/NBCOT National Student Conclave. Dearborn, Michigan. November 18-19 2016                   | no  | Conference abstract           |
| 45 | Guan, Q.               | 2015 | Multifactor analysis for risk factors involved in the fear of falling in patients with chronic stroke from mainland China                           | no  | Irrelevant outcome indicators |
| 46 | de Melo Borges, Sheila | 2015 | Fear of falling and falls in older adults with mild cognitive impairment and Alzheimer's disease.                                                   | no  | Irrelevant research object    |
| 47 | Cho, K.                | 2015 | Risk factors related to falling in stroke patients: a cross-sectional study                                                                         | no  | Irrelevant outcome indicators |
| 48 | Yatar, G. I.           | 2014 | The relationship between falling frequency, fear of falling, balance functions, balance security and hemiparetic side in patients with stroke       | no  | Full text not found           |

|    |                                     |      |                                                                                                                                                               |    |                               |
|----|-------------------------------------|------|---------------------------------------------------------------------------------------------------------------------------------------------------------------|----|-------------------------------|
| 49 | Phadke, C. P.                       | 2014 | Relationship between spasticity and balance confidence in persons post-stroke                                                                                 | no | Conference abstract           |
| 50 | Park, J.                            | 2014 | Relationships of stroke patients' gait parameters with fear of falling                                                                                        | no | Irrelevant outcome indicators |
| 51 | Lane, R. A.                         | 2014 | Fear of Falling in Claudicants and Its Relationship to Physical Ability, Balance, and Quality of Life                                                         | no | Irrelevant outcome indicators |
| 52 | Jalayondeja, C.                     | 2014 | Six-month prospective study of fall risk factors identification in patients post-stroke                                                                       | no | Irrelevant research object    |
| 53 | Da Silva, Carolyn P.                | 2014 | Falling, Balance Confidence, and Fear of Falling After Chronic Stroke                                                                                         | no | Qualitative research          |
| 54 | Azad, A.                            | 2014 | Clinical assessment of fear of falling after stroke: validity, reliability and responsiveness of the Persian version of the Fall Efficacy Scale-International | no | Irrelevant                    |
| 55 | Kneebone, I.                        | 2013 | Fear of falling: Psychological management after stroke                                                                                                        | no | Conference abstract           |
| 56 | Vahlberg, B.                        | 2012 | Factors related to mobility and physical activity in individuals one to three years after stroke                                                              | no | Conference abstract           |
| 57 | Perez-Jara, Javier                  | 2012 | Differences in fear of falling in the elderly with or without dizziness. [References]                                                                         | no | Irrelevant research object    |
| 58 | Kim, E. J.                          | 2012 | Fear of falling in subacute hemiplegic stroke patients: associating factors and correlations with quality of life                                             | no | Irrelevant outcome indicators |
| 59 | Batchelor, F. A.                    | 2012 | Falls after stroke                                                                                                                                            | no | Review                        |
| 60 | Schmid, A. A.                       | 2011 | Fear of falling among people who have sustained a stroke: A 6-month longitudinal pilot study                                                                  | no | Irrelevant outcome indicators |
| 61 | Matsuda, Patricia Noritake Akosile, | 2011 | Falls in multiple sclerosis                                                                                                                                   | no | Irrelevant research object    |
| 62 | Christophe r Olusanjo               | 2011 | Relationships between fall indices and physical function of stroke survivors in Nigeria...including commentary by Batchelor F and Bugdayci D                  | no | Irrelevant outcome indicators |
| 63 | Zapata, Paloma Olmos                | 2010 | Fear of falling in the elderly with recurrent dizziness: A descriptive study. [Spanish]. [References]                                                         | no | Not English/Chinese           |
| 64 | Balash, Y.                          | 2010 | Disorders of gait with fear of fall in community dwelling elders                                                                                              | no | Conference abstract           |
| 65 | Schmid, Arlene A.                   | 2009 | Consequences of Poststroke Falls: Activity Limitation, Increased Dependence, and the Development of Fear of Falling                                           | no | Qualitative research          |

|    |                                         |                                                                                                                                                 |     |                               |
|----|-----------------------------------------|-------------------------------------------------------------------------------------------------------------------------------------------------|-----|-------------------------------|
| 66 | Schmid, A. A. McGrath, Joanna Collicutt | 2009 Poststroke Fear of Failing in the Hospital Setting                                                                                         | no  | Irrelevant outcome indicators |
| 67 | Joanna Collicutt                        | 2008 Fear of falling after brain injury. [References]                                                                                           | no  | Irrelevant research object    |
| 68 | Batchelor, F.                           | 2008 Fear of falling and falls after stroke: the chicken or the egg?                                                                            | no  | Full text not found           |
| 69 | Andersson, Å G.                         | 2008 Fear of falling in stroke patients: Relationship with previous falls and functional characteristics                                        | no  | Full text not found           |
| 70 | Schmid, A. A.                           | 2007 Fear of falling: An emerging issue after stroke                                                                                            | no  | Qualitative research          |
| 71 | Morley, John E                          | 2007 Falls--where do we stand?                                                                                                                  | no  | Irrelevant research object    |
| 72 | Chou, Kee-Lee                           | 2007 The temporal relationship between falls and fear-of-falling among Chinese older primary-care patients in Hong Kong.                        | no  | Irrelevant research object    |
| 73 | Balash, Y.                              | 2007 The effects of reducing fear of falling on locomotion in older adults with a higher level gait disorder                                    | no  | Irrelevant research object    |
| 74 | Belgen, B.                              | 2006 The association of balance capacity and falls self-efficacy with history of falling in community-dwelling people with chronic stroke       | yes |                               |
| 75 | Andresen, Elena M.                      | 2006 Cross-Sectional and Longitudinal Risk Factors for Falls, Fear of Falling, and Falls Efficacy in a Cohort of Middle-Aged African Americans. | no  | Irrelevant outcome indicators |
| 76 | Watanabe, Y.                            | 2005 Fear of falling among stroke survivors after discharge from inpatient rehabilitation                                                       | no  | incomplete data               |
| 77 | Rosén, E.                               | 2005 Fear of falling, balance, and gait velocity in patients with stroke                                                                        | no  | Irrelevant outcome indicators |
| 78 | Giladi, N.                              | 2005 Clinical characteristics of elderly patients with a cautious gait of unknown origin                                                        | no  | Irrelevant research object    |
| 79 | Stolze, H.                              | 2004 Falls in frequent neurological diseases - Prevalence, risk factors and aetiology                                                           | no  | Irrelevant research object    |
| 80 | Friedman, S. M.                         | 2002 Falls and fear of falling: Which comes first? A longitudinal prediction model suggests strategies for primary and secondary prevention     | no  | Irrelevant research object    |
| 81 | Strubel, D.                             | 2001 [Dementia and falls]                                                                                                                       | no  | Not English/Chinese           |
| 82 | Karin Hellström                         | 1999 Fear of falling in patients with stroke:a reliability study                                                                                | no  | Irrelevant outcome indicators |
| 83 | Mahsa Kaviani                           | 2016 The Correlation between the Standing Stability and Fear of Falling in Patients with Stroke                                                 | no  | Not English/Chinese           |

|    |                          |      |                                                                                                                                                      |     |                               |
|----|--------------------------|------|------------------------------------------------------------------------------------------------------------------------------------------------------|-----|-------------------------------|
| 84 | Hamid Azadeh             | 2018 | The Correlation Between Rates of Falling, Balance, Quality of Life and Fear of Falling in Patients With Chronic Stroke                               | no  | Irrelevant outcome indicators |
| 85 | Thomas Hadjistavropoulos | 2011 | The Relationship of Fear of Falling and Balance Confidence With Balance and Dual Tasking Performance                                                 | no  | Irrelevant research object    |
| 86 | Mania Sheikh             | 2016 | Fear of Falling in Patients with Chronic Stroke: Differences of Functional Gait and Balance Measures According to the Level of Concern about Falling | no  | Irrelevant outcome indicators |
| 87 | Alison Schinkel-Ivy      | 2015 | Relationships between fear of falling, balance confidence, and control of balance, gait, and reactive stepping in individuals with sub-acute stroke  | no  | Irrelevant outcome indicators |
| 88 | Zhou Min                 | 2016 | Current status and influencing factors of fear of falling among elderly in patients                                                                  | no  | Irrelevant outcome indicators |
| 89 | Chen Ping                | 2018 | Study on the Status and Influencing Factors about Fear of Falling in Community-dwelling Older Adults with Stroke                                     | no  | Irrelevant research object    |
| 90 | Deng Ning                | 2016 | The status and influencing factors of fear of falling in patients with first ever cerebral infarction                                                | no  | Irrelevant outcome indicators |
| 91 | Shao Ping                | 2016 | The relationship between fear of falling and anxiety and depression in elderly patients with stroke                                                  | no  | Irrelevant outcome indicators |
| 92 | Arlene A. Schmid         | 2009 | Poststroke Fear of Falling in the Hospital Setting                                                                                                   | no  | Irrelevant outcome indicators |
| 93 | Netha Hussain            | 2021 | Prediction of fear of falling at 6 months after stroke based on 279 individuals from the Fall Study of Gothenburg                                    | yes |                               |
