# Supplementary material for: Risk factors for fear of falling in stroke patients: a systematic review and meta-analysis
Source: HighWire-hosted journal article supplement (doi:10.1136/bmjopen-2021-056340), 2022-06-01
Supplement: bmjopen-2021-056340supp003_data_supplement.pdf [file bmjopen-2021-056340supp003_data_supplement.pdf]

| #     | Including (✓ or ×) | Author       | Year | Measuring tools                                                                              | Study design             | Research period                          | Country | Total sample size | Sample source of experimental group                                                                                                                                                                                                                    | Experimental group (N) | Control group (N) | Sample source of control group | Age, years (Mean±SD)                   | Female (N,%) | Stroke reference period                                                                       | Adjusted risk factors       | OR            | LL-95%CI | UL-95%CI   | Selection   | Quality evaluation of NOS |   |   | Quality evaluation of AHRQ |
|-------|--------------------|--------------|------|----------------------------------------------------------------------------------------------|--------------------------|------------------------------------------|---------|-------------------|--------------------------------------------------------------------------------------------------------------------------------------------------------------------------------------------------------------------------------------------------------|------------------------|-------------------|--------------------------------|----------------------------------------|--------------|-----------------------------------------------------------------------------------------------|-----------------------------|---------------|----------|------------|-------------|---------------------------|---|---|----------------------------|
|       |                    |              |      |                                                                                              |                          |                                          |         |                   |                                                                                                                                                                                                                                                        |                        |                   |                                |                                        |              |                                                                                               |                             | Comparability | Outcome  | NOS scores | AHRQ scores |                           |   |   |                            |
| NO.1  | ✓                  | Zhang Qin    | 2020 | Self-made questionnaire, ADL, SAS, SDS, SFES-I                                               | cross-sectional study    | May 2017-January 2019                    | China   | 221               | the Medical Department of Neurology, Department of Cardiology, Shandong First Medical University, Shandong, People's Republic of China                                                                                                                 | NR                     | NR                | NR                             | 60.13±8.72                             | 88 (39.82)   | first-onset stroke recovery period                                                            | 1.Age;                      | 1.355         | 1.057    | 1.737      |             |                           |   |   | 4                          |
|       |                    |              |      |                                                                                              |                          |                                          |         |                   |                                                                                                                                                                                                                                                        |                        |                   |                                |                                        |              | 2.Marital status;                                                                             | 0.617                       | 0.435         | 0.875    |            |             |                           |   |   |                            |
|       |                    |              |      |                                                                                              |                          |                                          |         |                   |                                                                                                                                                                                                                                                        |                        |                   |                                |                                        |              | 3. History of falls;                                                                          | 2.058                       | 1.165         | 3.635    |            |             |                           |   |   |                            |
|       |                    |              |      |                                                                                              |                          |                                          |         |                   |                                                                                                                                                                                                                                                        |                        |                   |                                |                                        |              | 4.Anxiety;                                                                                    | 2.292                       | 1.431         | 3.671    |            |             |                           |   |   |                            |
|       |                    |              |      |                                                                                              |                          |                                          |         |                   |                                                                                                                                                                                                                                                        |                        |                   |                                |                                        |              | 5.Depression                                                                                  | 1.802                       | 1.217         | 2.669    |            |             |                           |   |   |                            |
| NO.10 | ✓                  | Li Ying      | 2014 | Self-made questionnaire, MMSE, The single-item question, MFES, BBS, TUGT                     | case-control study       | March 2013-August 2013                   | China   | 170               | the Medical Department of Neurology, Huadong Hospital Affiliated to Fudan University, Shanghai, People's Republic of China                                                                                                                             | 67                     | 103               | Patients in the same period    | 73.54; Male: 73.0±8.4 Female: 74.2±7.6 | 76 (44.70)   | Medically diagnosed                                                                           | 1. Berg balance force (min) | 0.697         | 0.609    | 0.799      | 4           | 2                         | 3 | 9 |                            |
|       |                    |              |      |                                                                                              |                          |                                          |         |                   |                                                                                                                                                                                                                                                        |                        |                   |                                |                                        |              | 2. TUG mobile capability (s)                                                                  | 1.180                       | 1.093         | 1.273    |            |             |                           |   |   |                            |
|       |                    |              |      |                                                                                              |                          |                                          |         |                   |                                                                                                                                                                                                                                                        |                        |                   |                                |                                        |              | 3.History of falls within 6 meters                                                            | 2.728                       | 1.082         | 6.878    |            |             |                           |   |   |                            |
| NO.14 | ✓                  | Yadav, T.    | 2020 | TUG, FM, PHQ-9, The single-item question                                                     | case-control study       | 23 August-10 February 2019.              | India   | 82                | Data were collected from 82 subjects who were recruited from tertiary-care rehabilitation centers, specialized centers for elderly, hospitals/clinics where they came for follow-up visits, and by contacting physical therapists providing home visit | 59                     | 23                | community controls             | 51.6 ± 12.13                           | 22(26.8)     | patients with cerebral stroke for more than 3 months                                          | 1..Gender (Male)            | 3.254         | 0.826    | 12.822     | 4           | 2                         | 2 | 8 |                            |
|       |                    |              |      |                                                                                              |                          |                                          |         |                   |                                                                                                                                                                                                                                                        |                        |                   |                                |                                        |              | 2.Fugl-Meyer Scale score                                                                      | 1.136                       | 1.002         | 1.287    |            |             |                           |   |   |                            |
|       |                    |              |      |                                                                                              |                          |                                          |         |                   |                                                                                                                                                                                                                                                        |                        |                   |                                |                                        |              | 3.Timed Up and Go score                                                                       | 1.006                       | 0.904         | 1.119    |            |             |                           |   |   |                            |
| NO.25 | ✓                  | Amanda Larén | 2018 | The single-item question, The SwPASS, SGPALS, using a walking aid and/or a wheelchair, NIHSS | prospective cohort study | between 1 October 2014 and 30 June 2016. | Sweden  | 462               | the stroke unit of the Sahlgrenska University Hospital (SU)/Östra, Gothenburg, Sweden                                                                                                                                                                  | 237                    | 225               | similar participants           | 74.8 ± 12                              | 226 (48.9)   | patients aged 18 years or older with a diagnosis of a first-ever or recurrent clinical stroke | 1.Female                    | 2.25          | 1.46     | 3.46       | 3           | 2                         | 3 | 8 |                            |



|                                         |      |      |      |
|-----------------------------------------|------|------|------|
| 6.SwePASS score--<br>Moderate (25-30)   | 2.32 | 0.98 | 5.52 |
| 7.SGPALS score--<br>Physically inactive | 2.04 | 1.01 | 4.12 |
